# Supplementary figures and images for: Post Reinforcement Learning Inference
Source: Atypon-hosted journal article supplement (doi:10.1287/opre.2024.1019), 2025-12-24

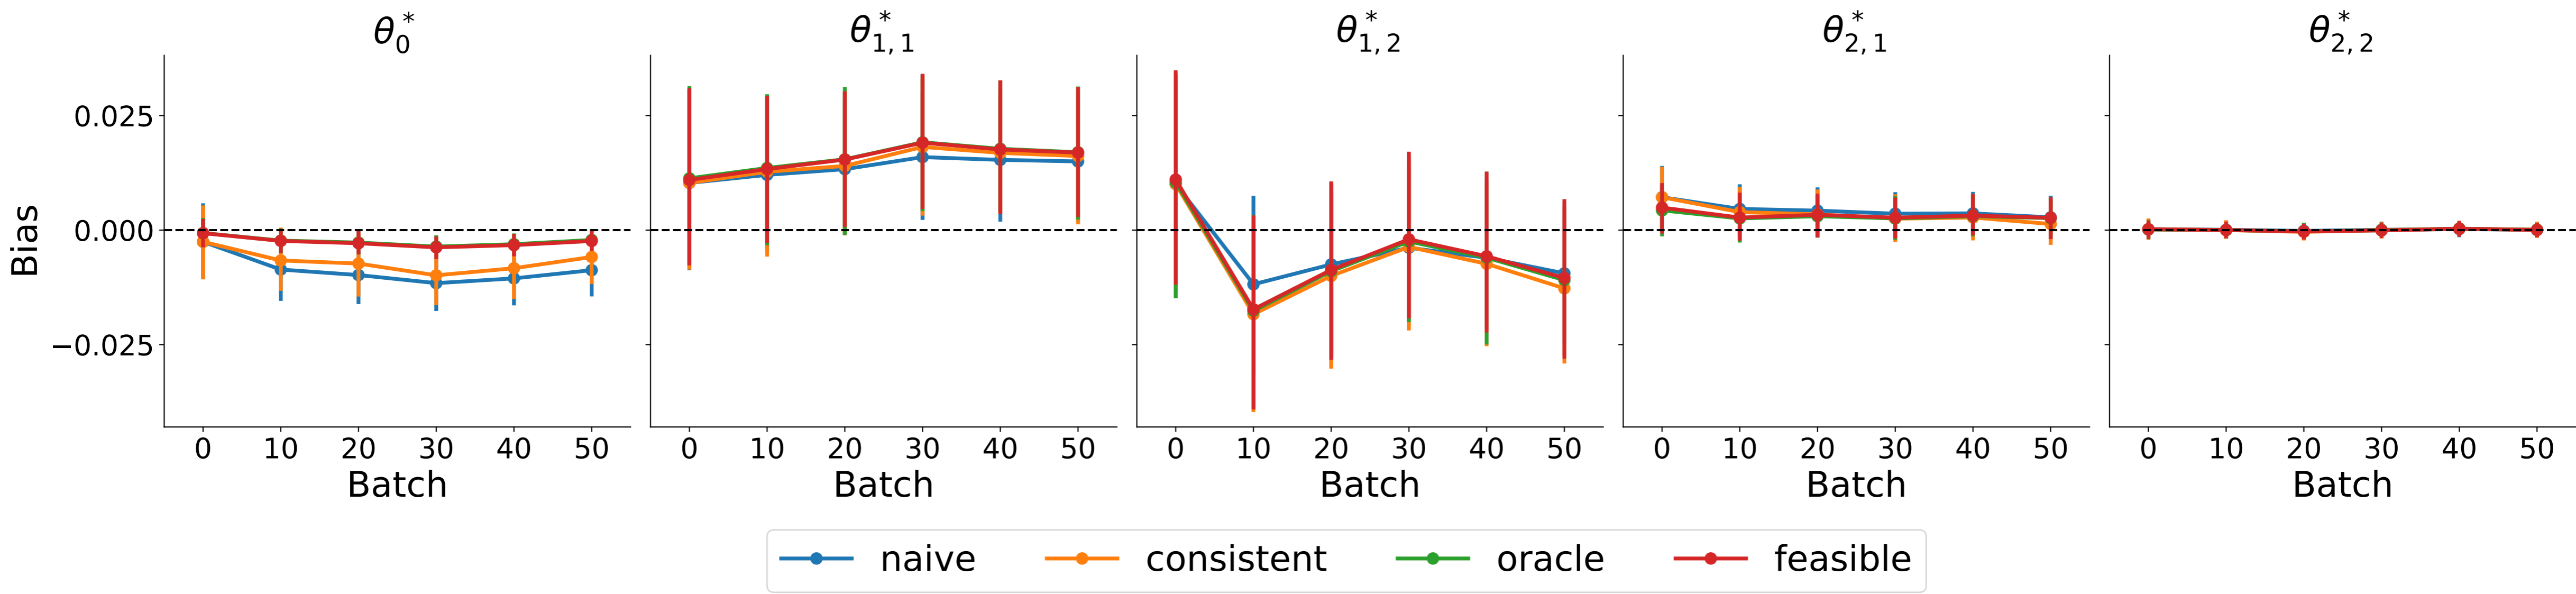

Supplement: opre.2024.1019.sm1.gz [file bias_gmm.pdf › RuohanZhan-rl_inference-41a34da/plots/bias_gmm.pdf]

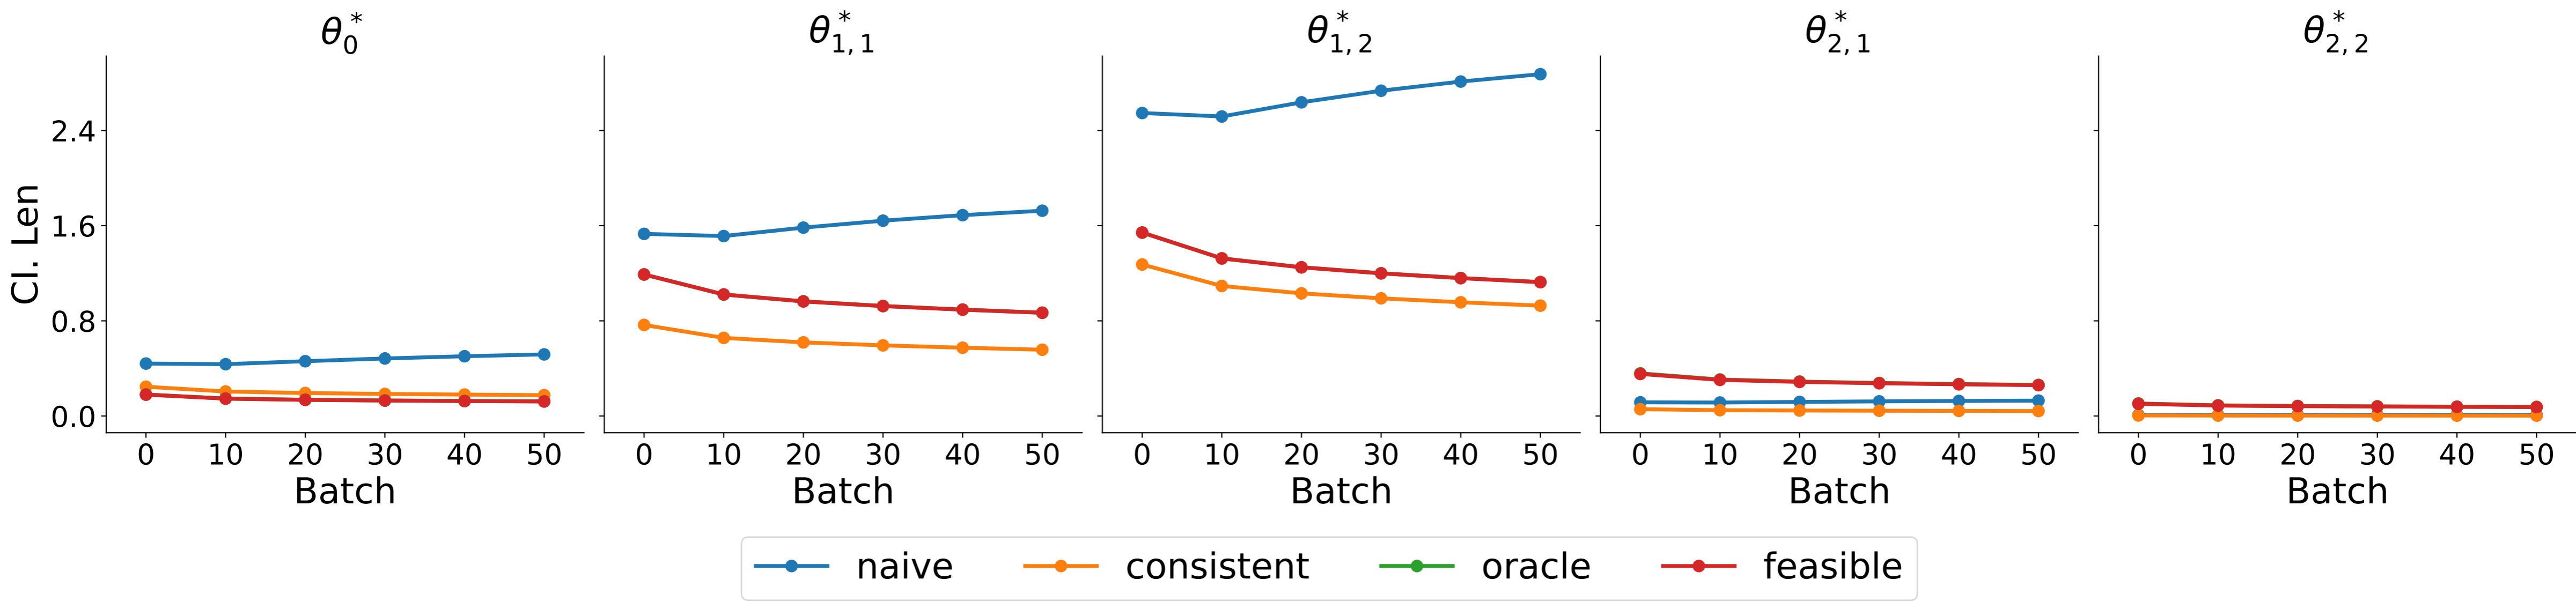

Supplement: opre.2024.1019.sm1.gz [file ci_gmm.pdf › RuohanZhan-rl_inference-41a34da/plots/ci_gmm.pdf]

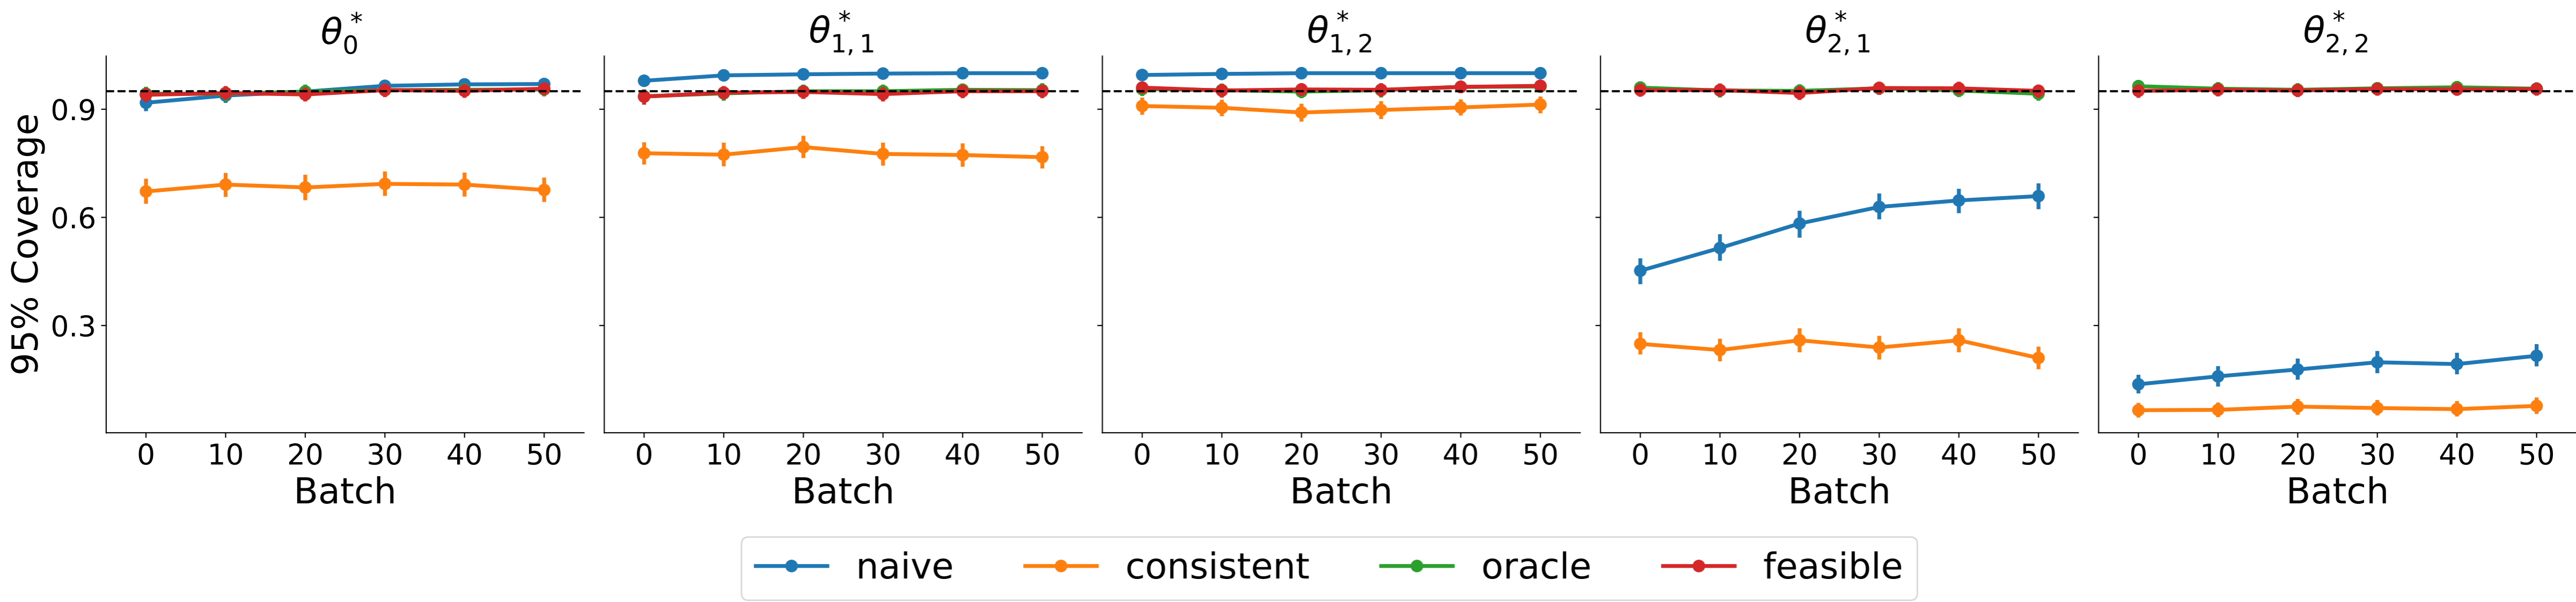

Supplement: opre.2024.1019.sm1.gz [file cov_gmm.pdf › RuohanZhan-rl_inference-41a34da/plots/cov_gmm.pdf]

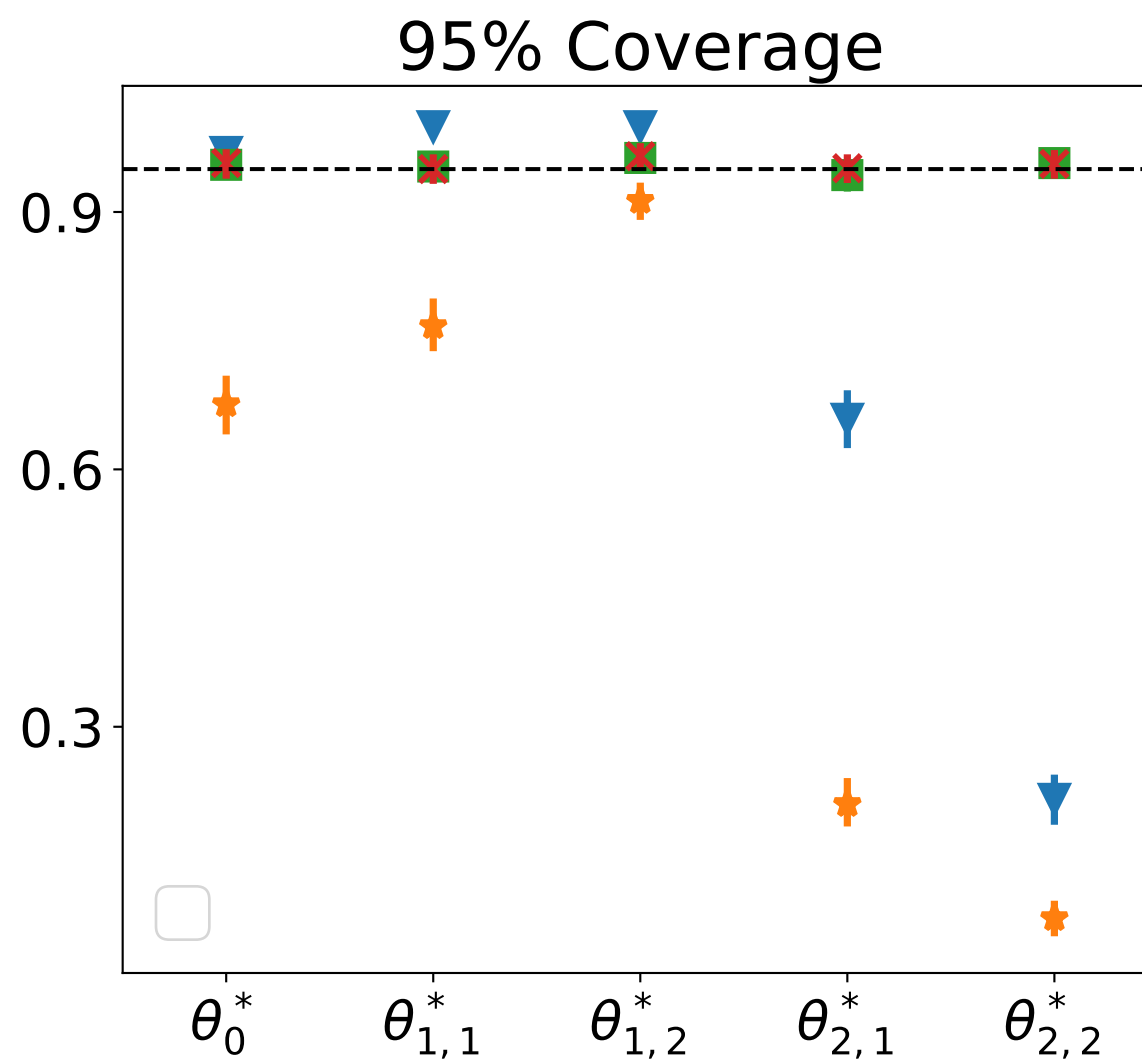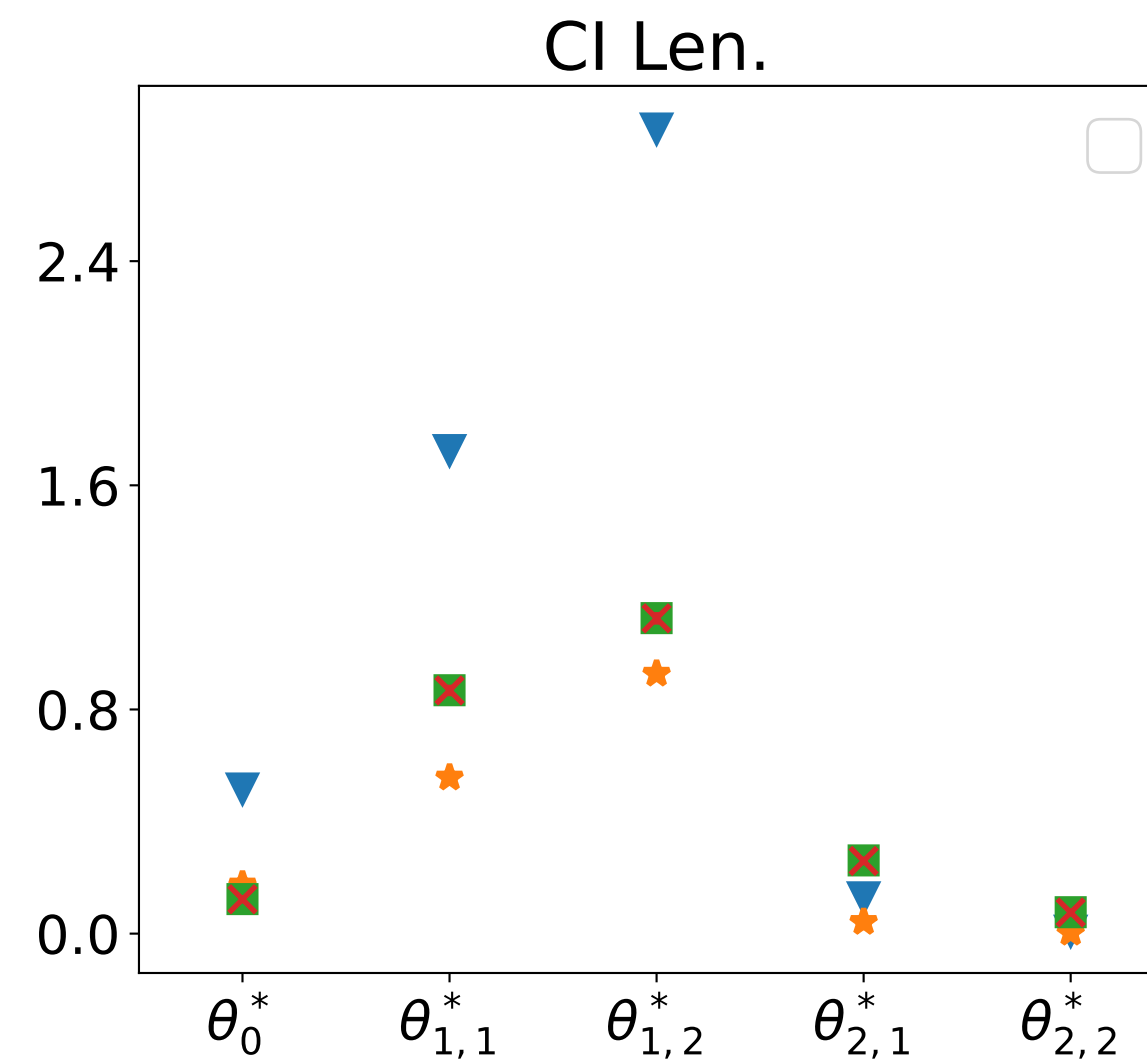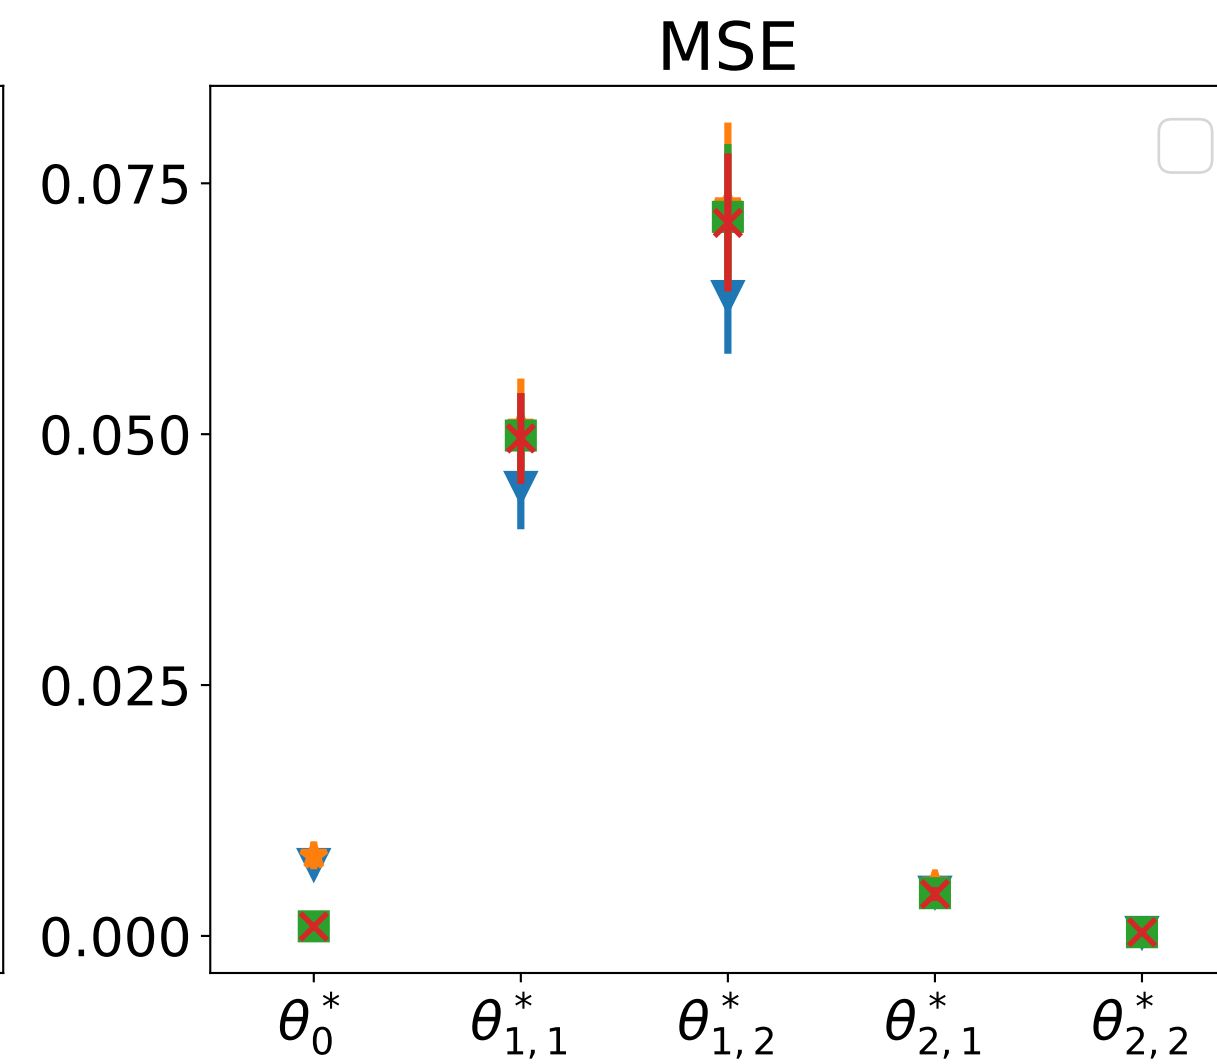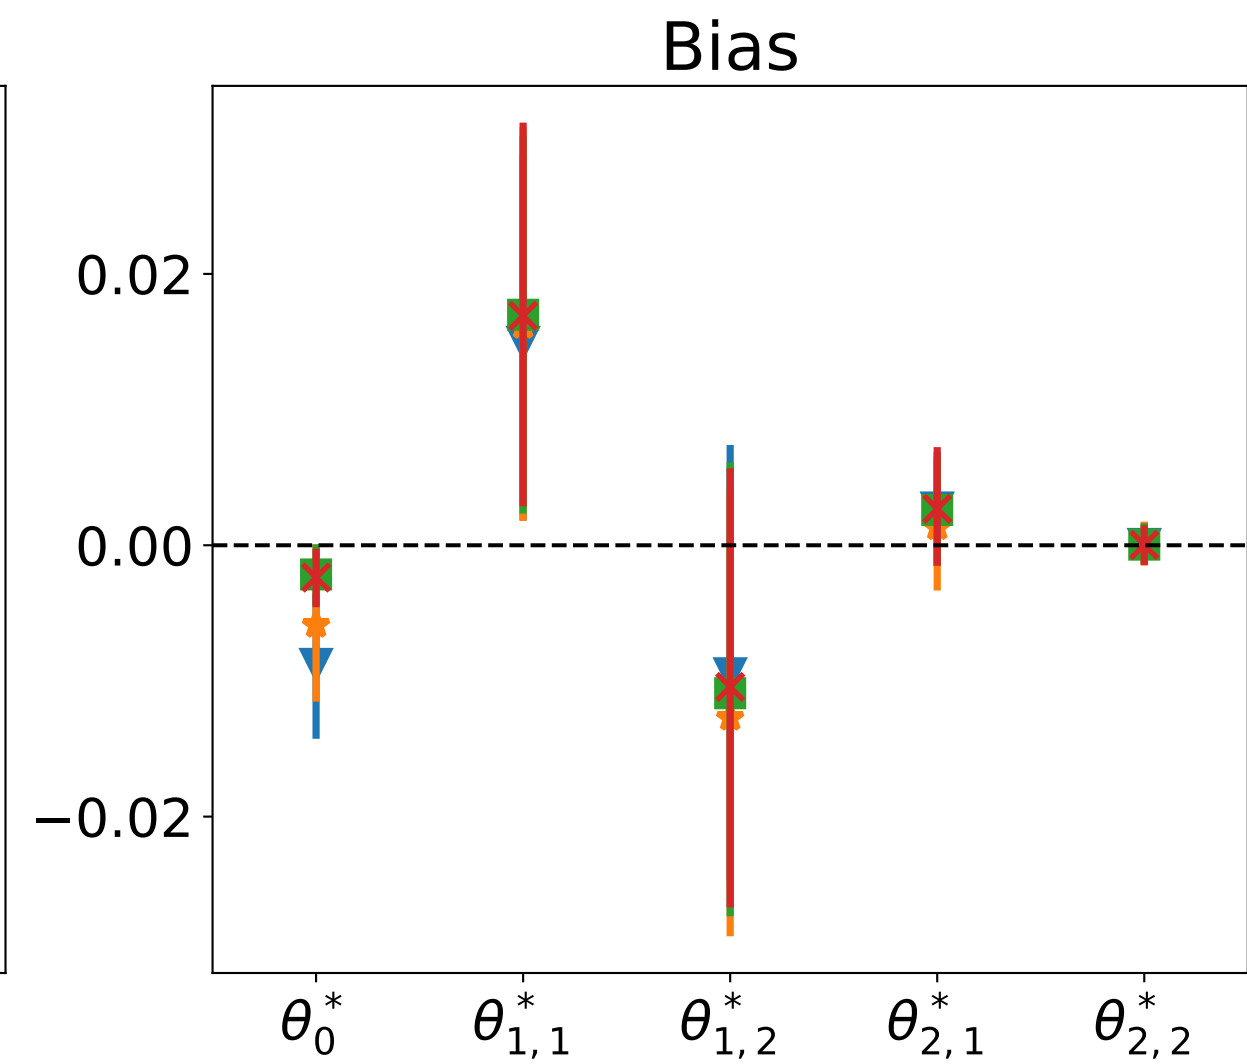

▼ naive    ★ consistent    ■ oracle    × feasible

Supplement: opre.2024.1019.sm1.gz [file lasso_last_all_gmm.pdf › RuohanZhan-rl_inference-41a34da/plots/lasso_last_all_gmm.pdf]

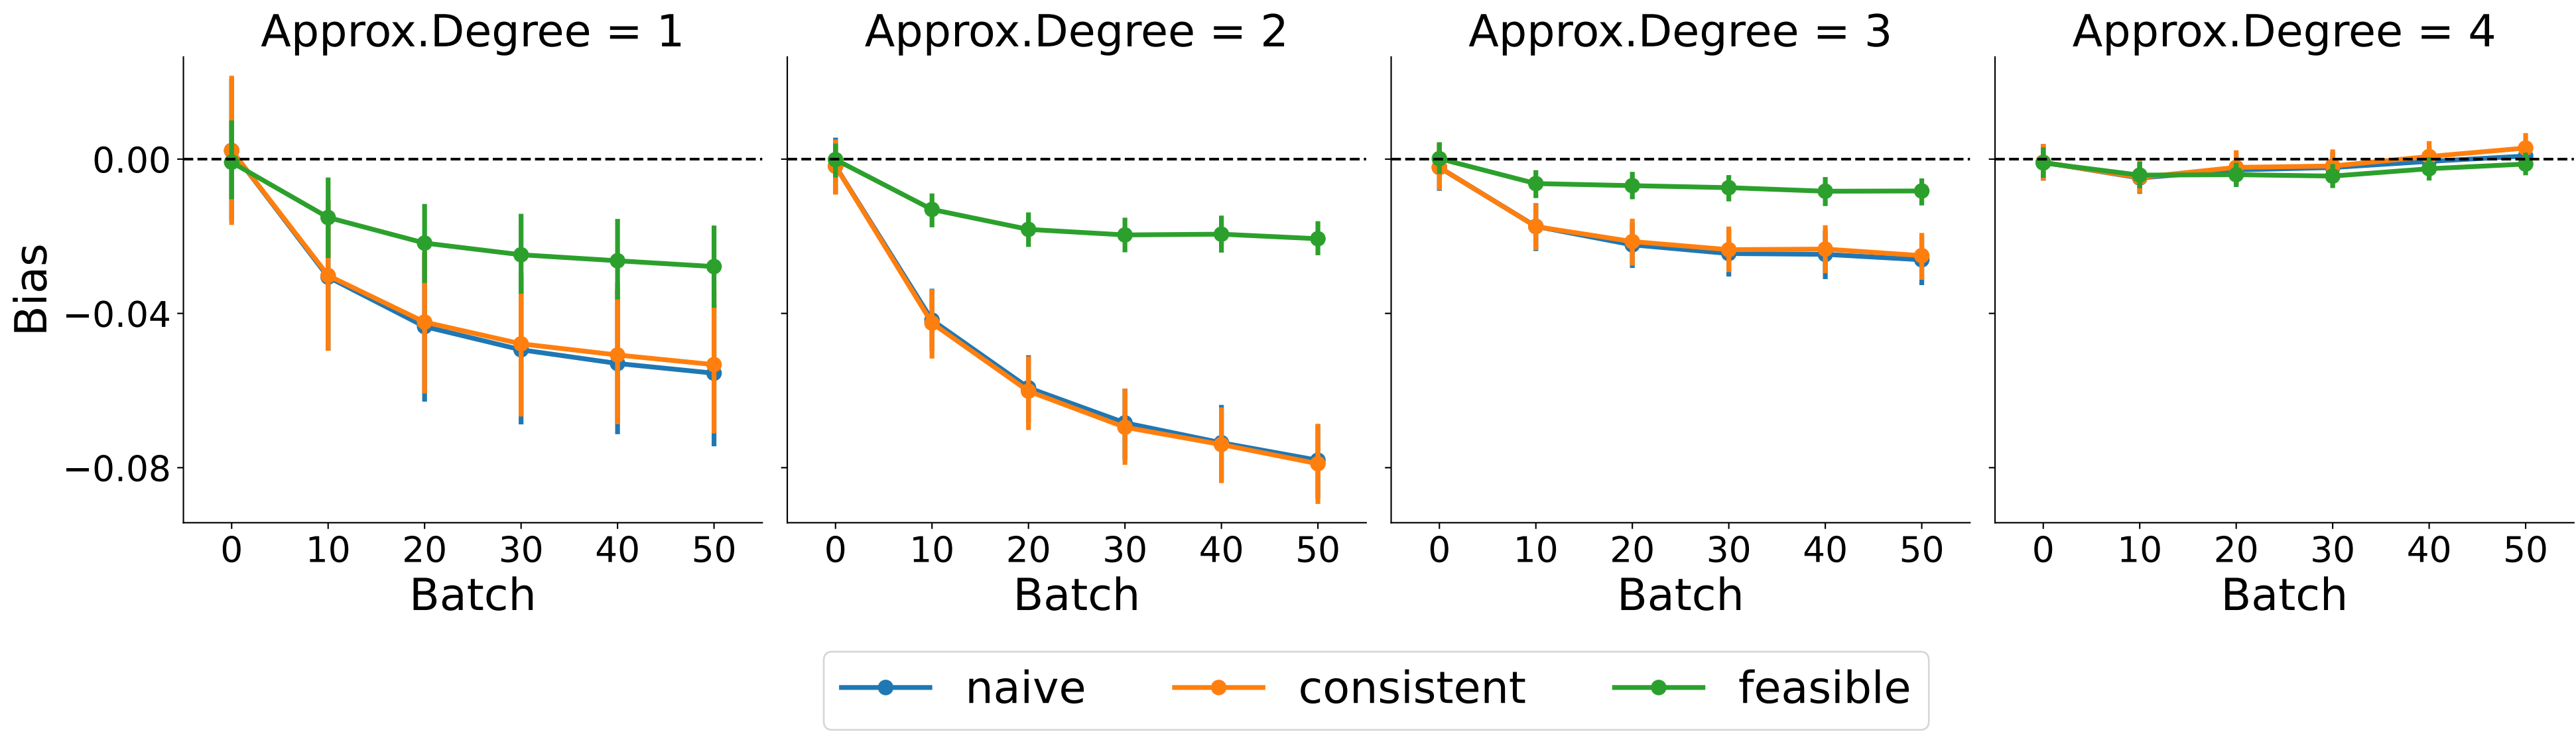

Supplement: opre.2024.1019.sm1.gz [file misspec_bias_gmm.pdf › RuohanZhan-rl_inference-41a34da/plots/misspec_bias_gmm.pdf]

Approx.Degree = 1

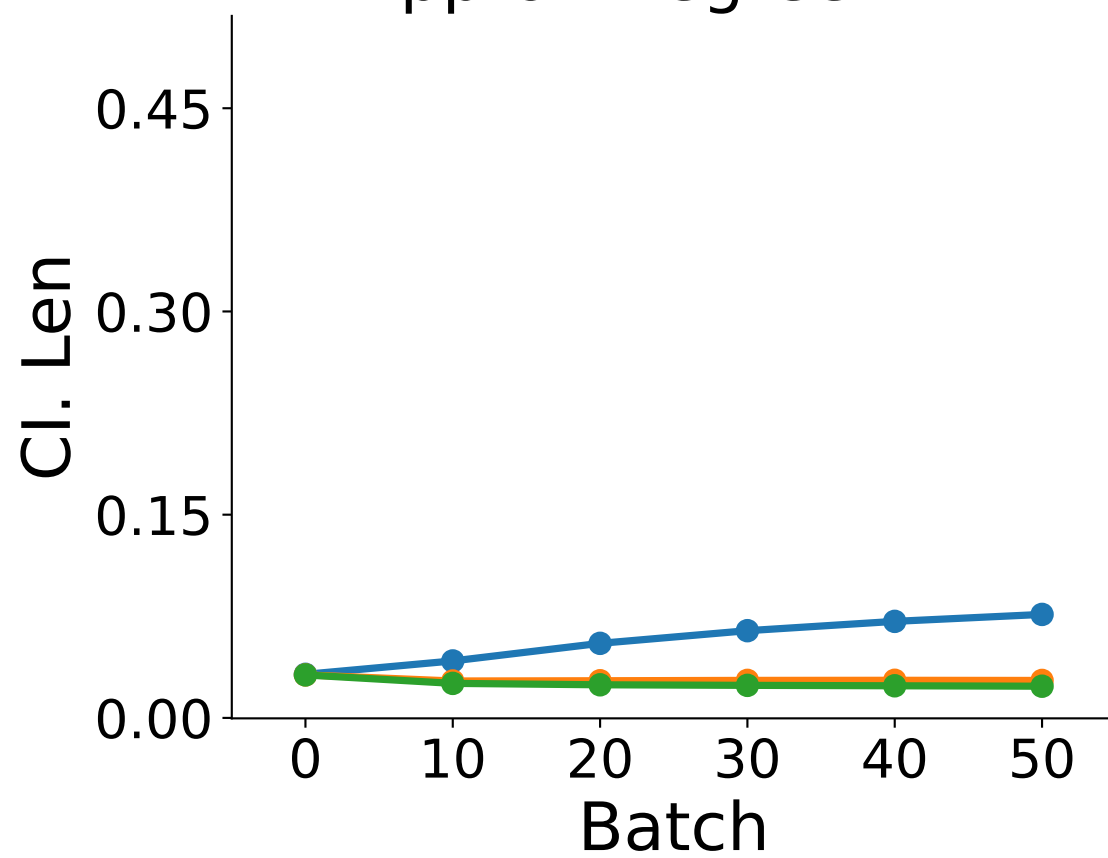

Approx.Degree = 2

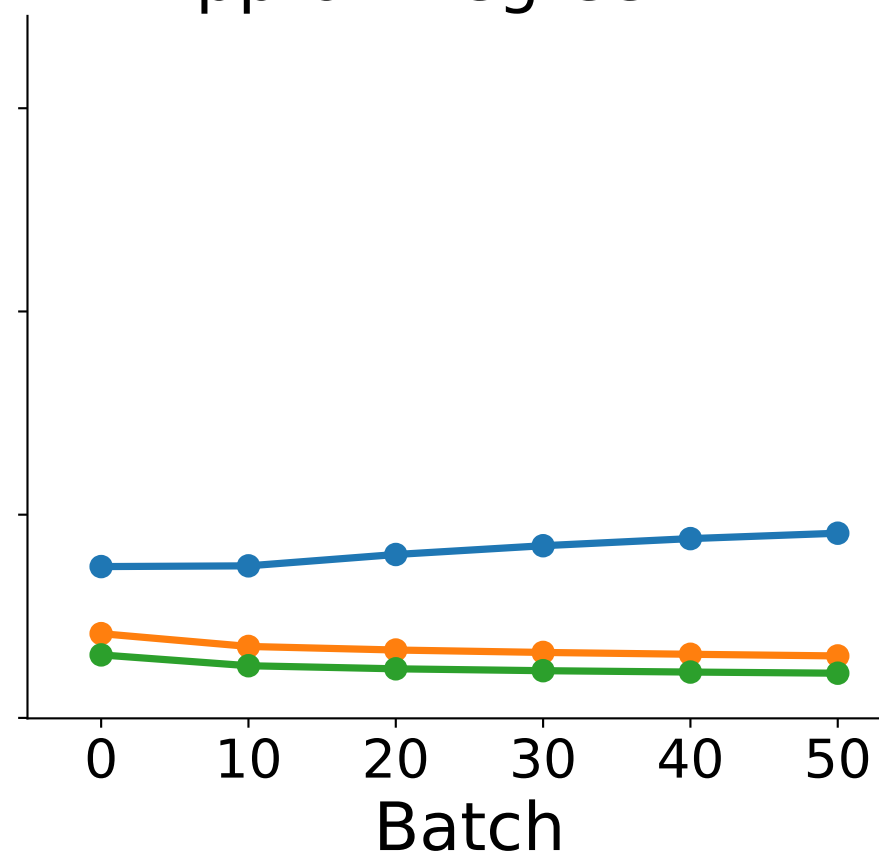

Approx.Degree = 3

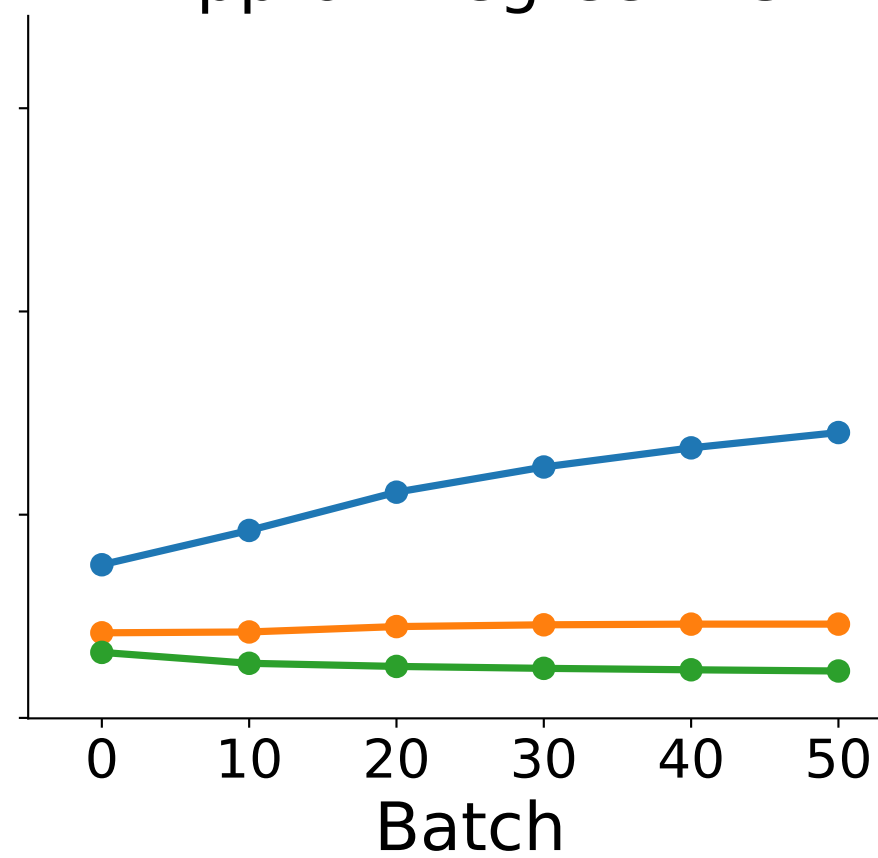

Approx.Degree = 4

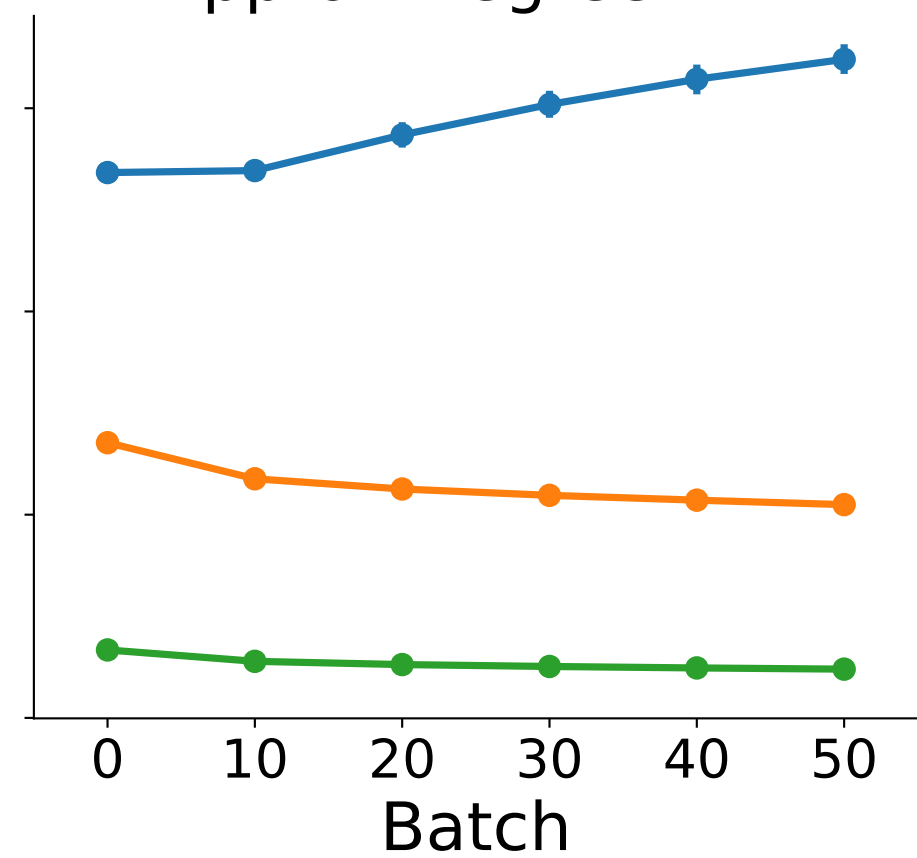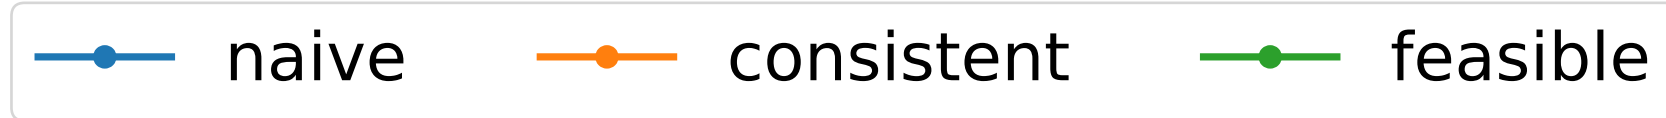

Supplement: opre.2024.1019.sm1.gz [file misspec_ci_gmm.pdf › RuohanZhan-rl_inference-41a34da/plots/misspec_ci_gmm.pdf]

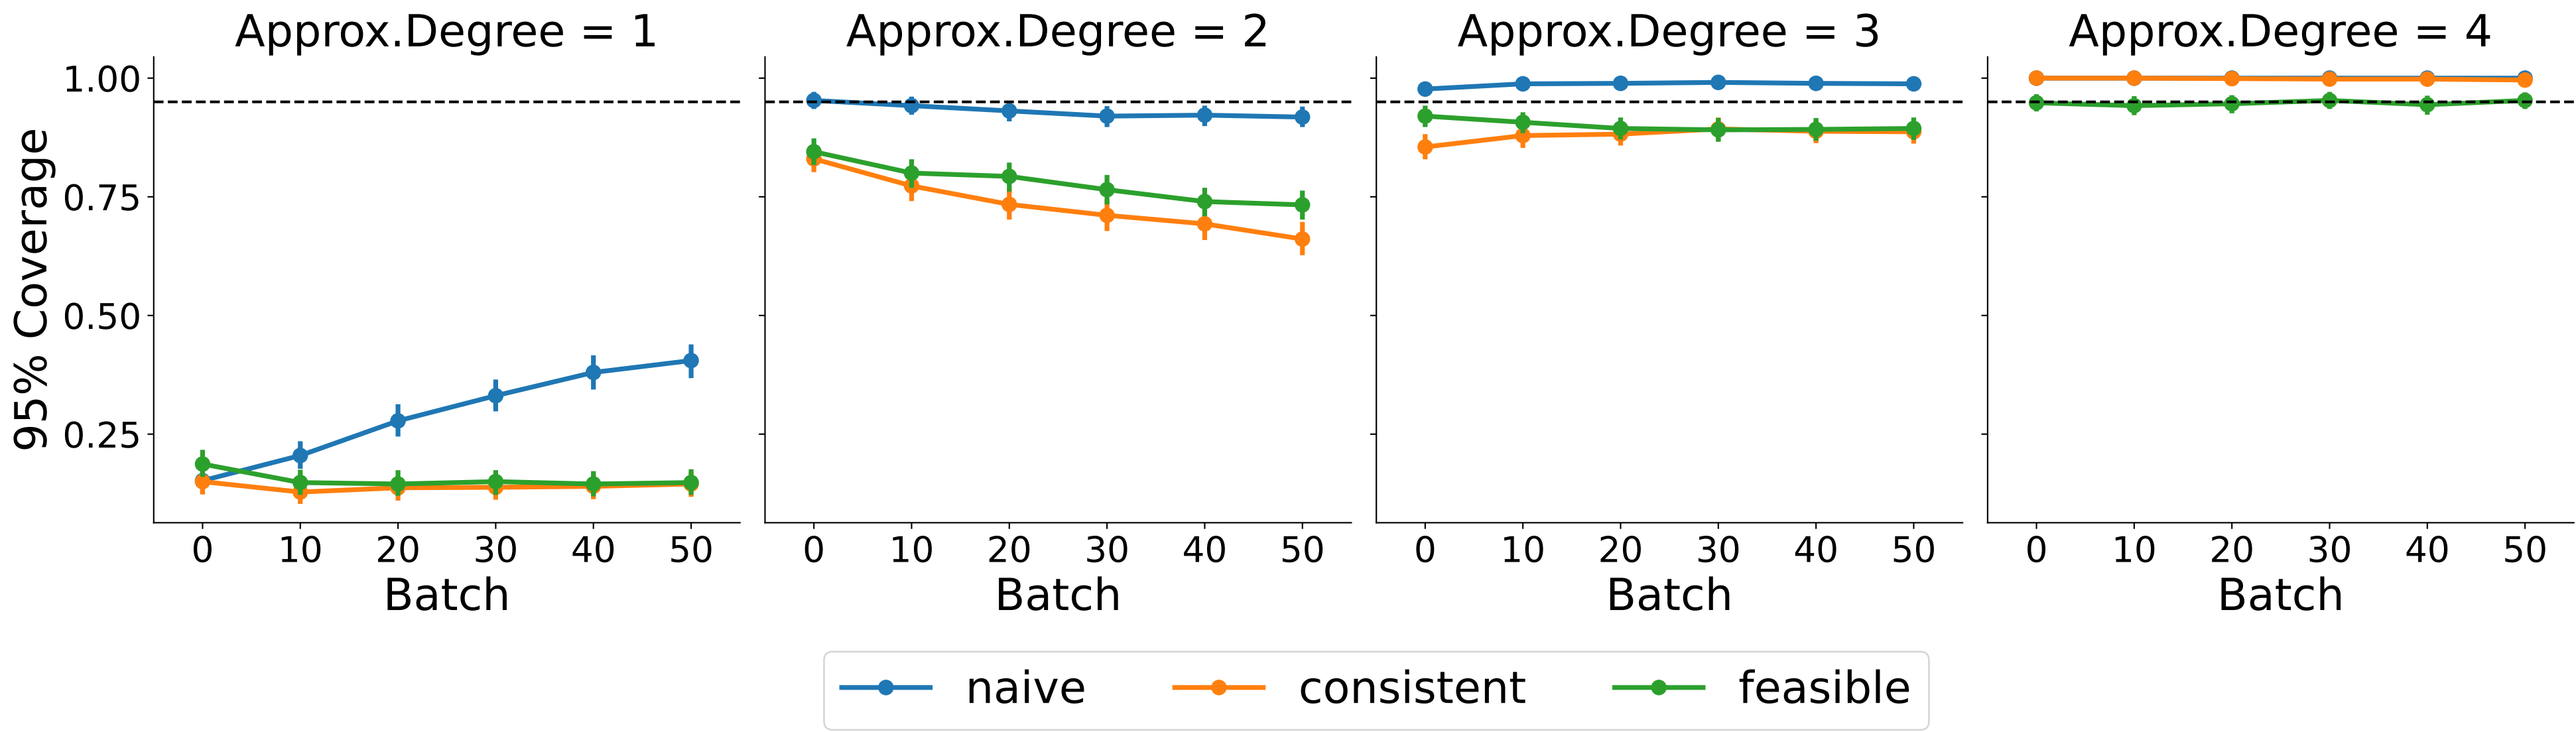

Supplement: opre.2024.1019.sm1.gz [file misspec_cov_gmm.pdf › RuohanZhan-rl_inference-41a34da/plots/misspec_cov_gmm.pdf]

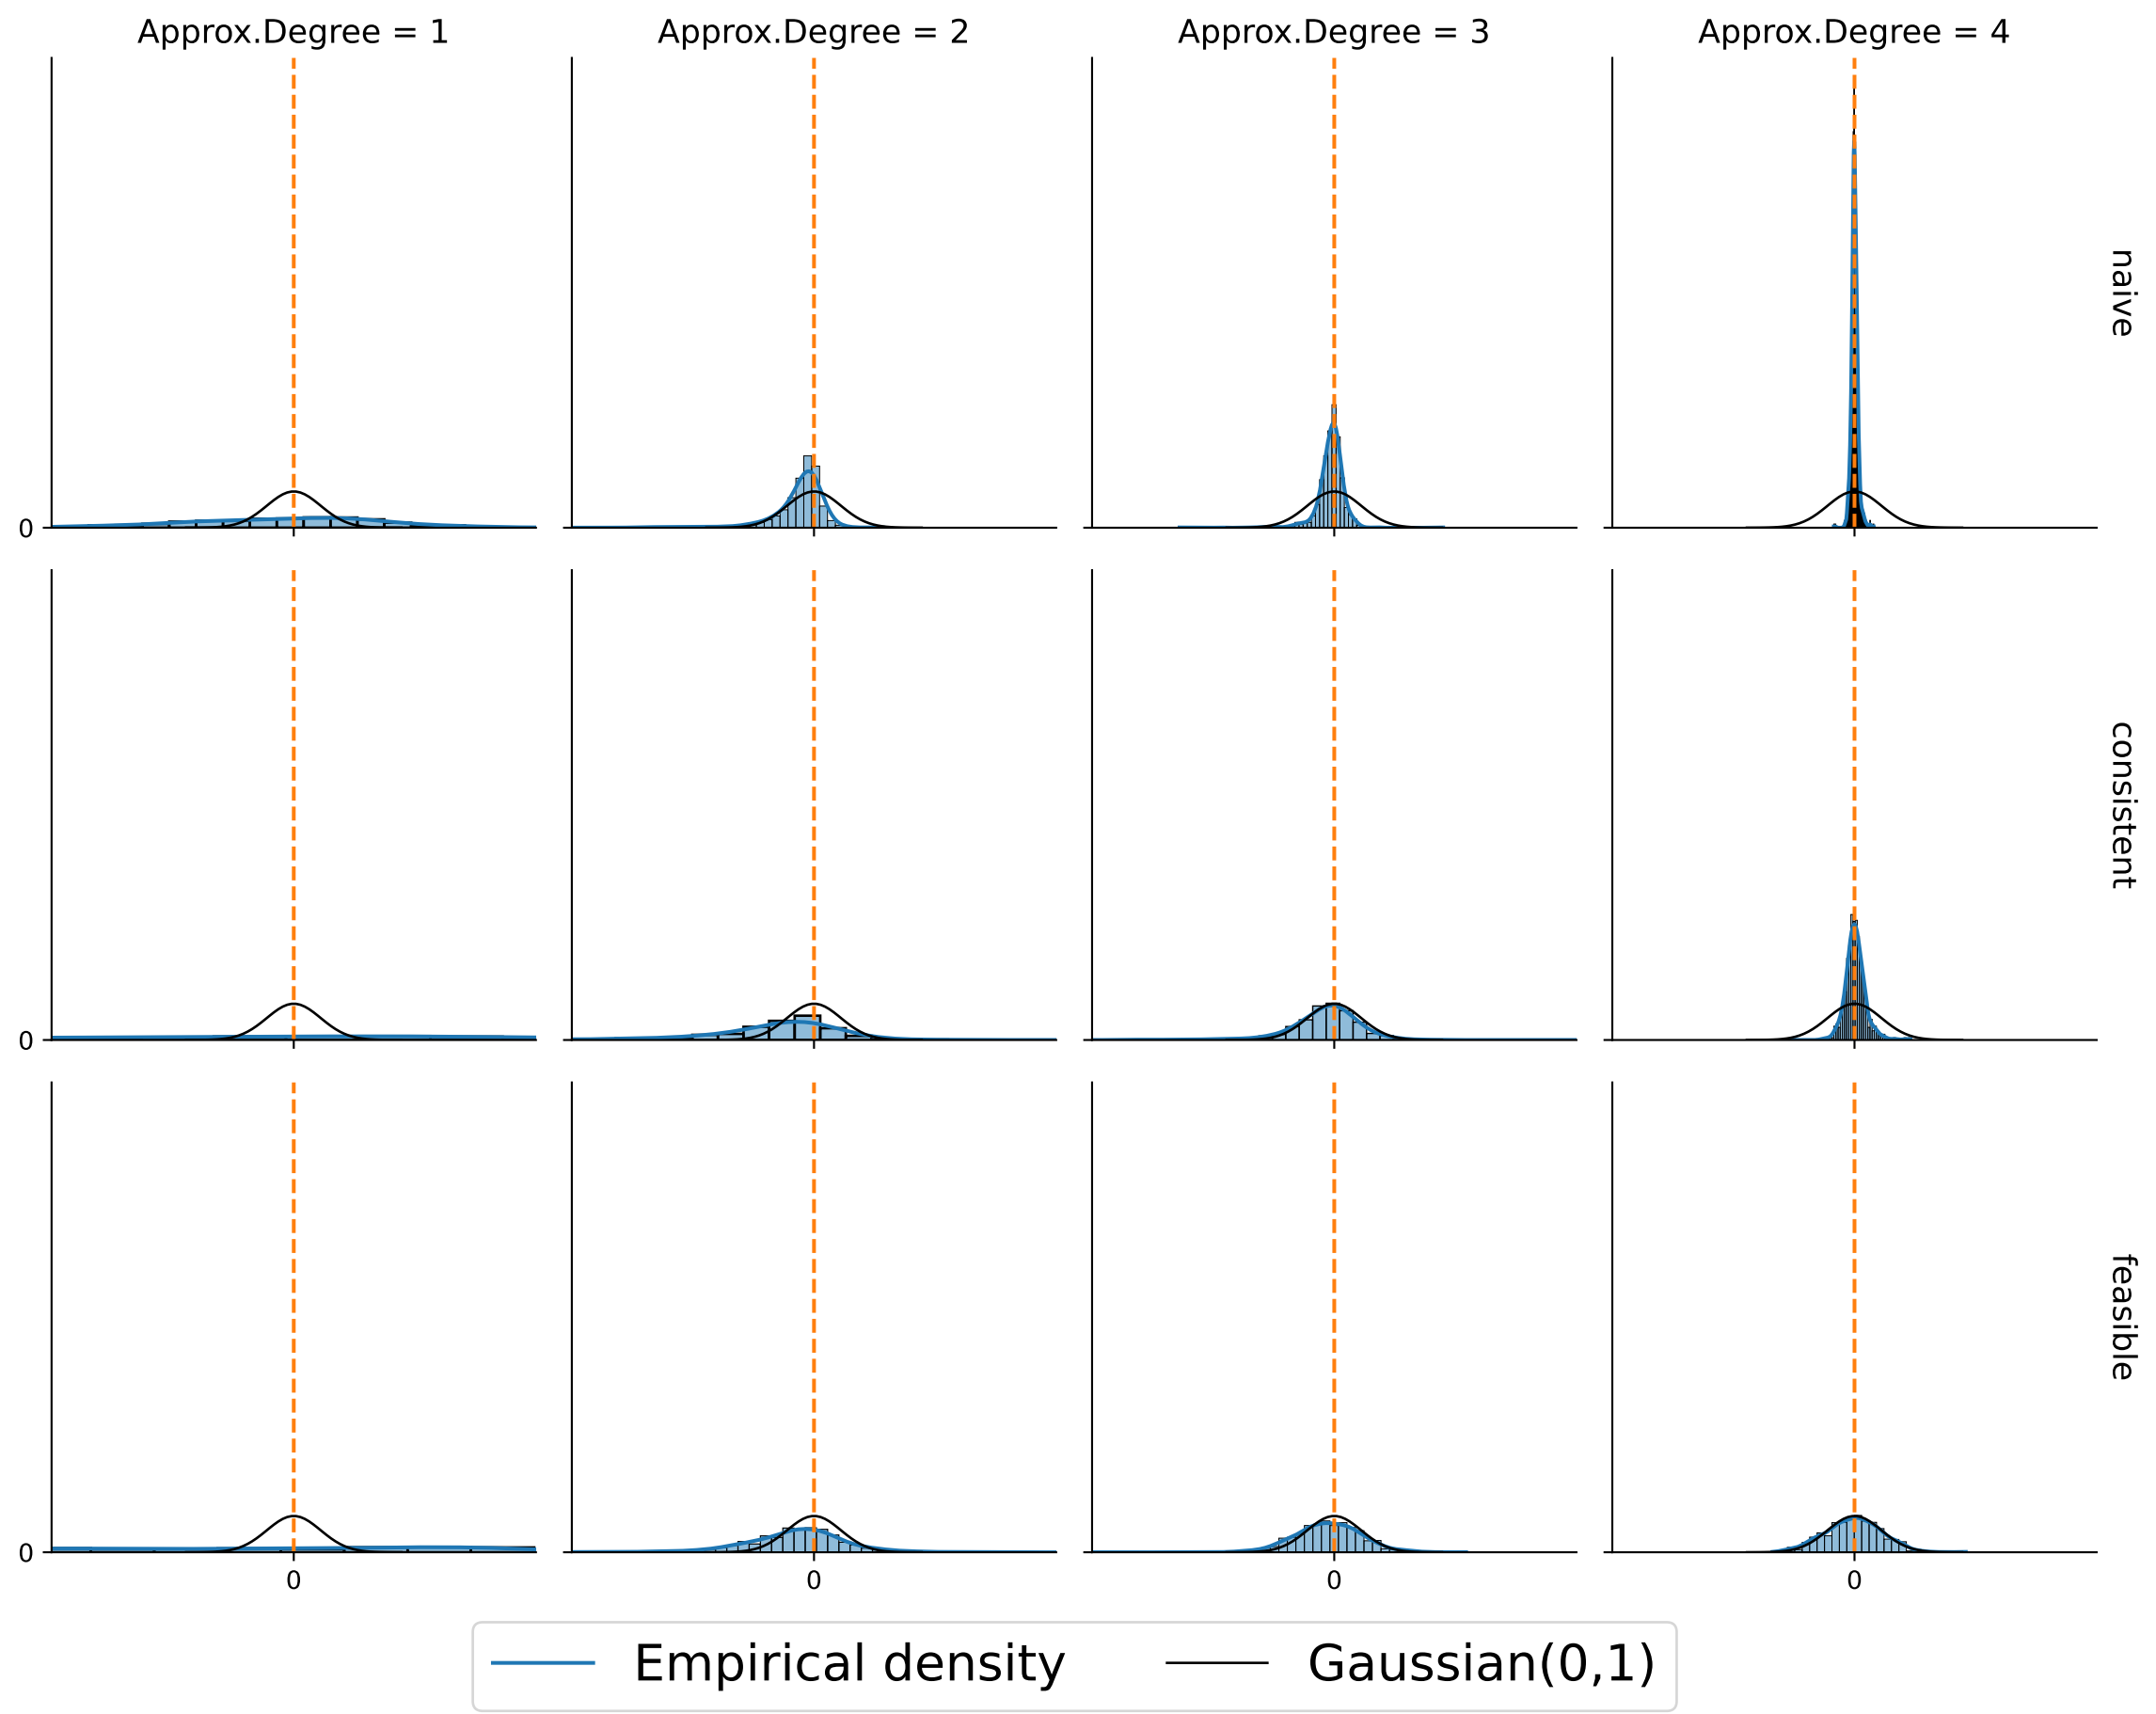

Supplement: opre.2024.1019.sm1.gz [file misspec_hist_gmm.pdf › RuohanZhan-rl_inference-41a34da/plots/misspec_hist_gmm.pdf]

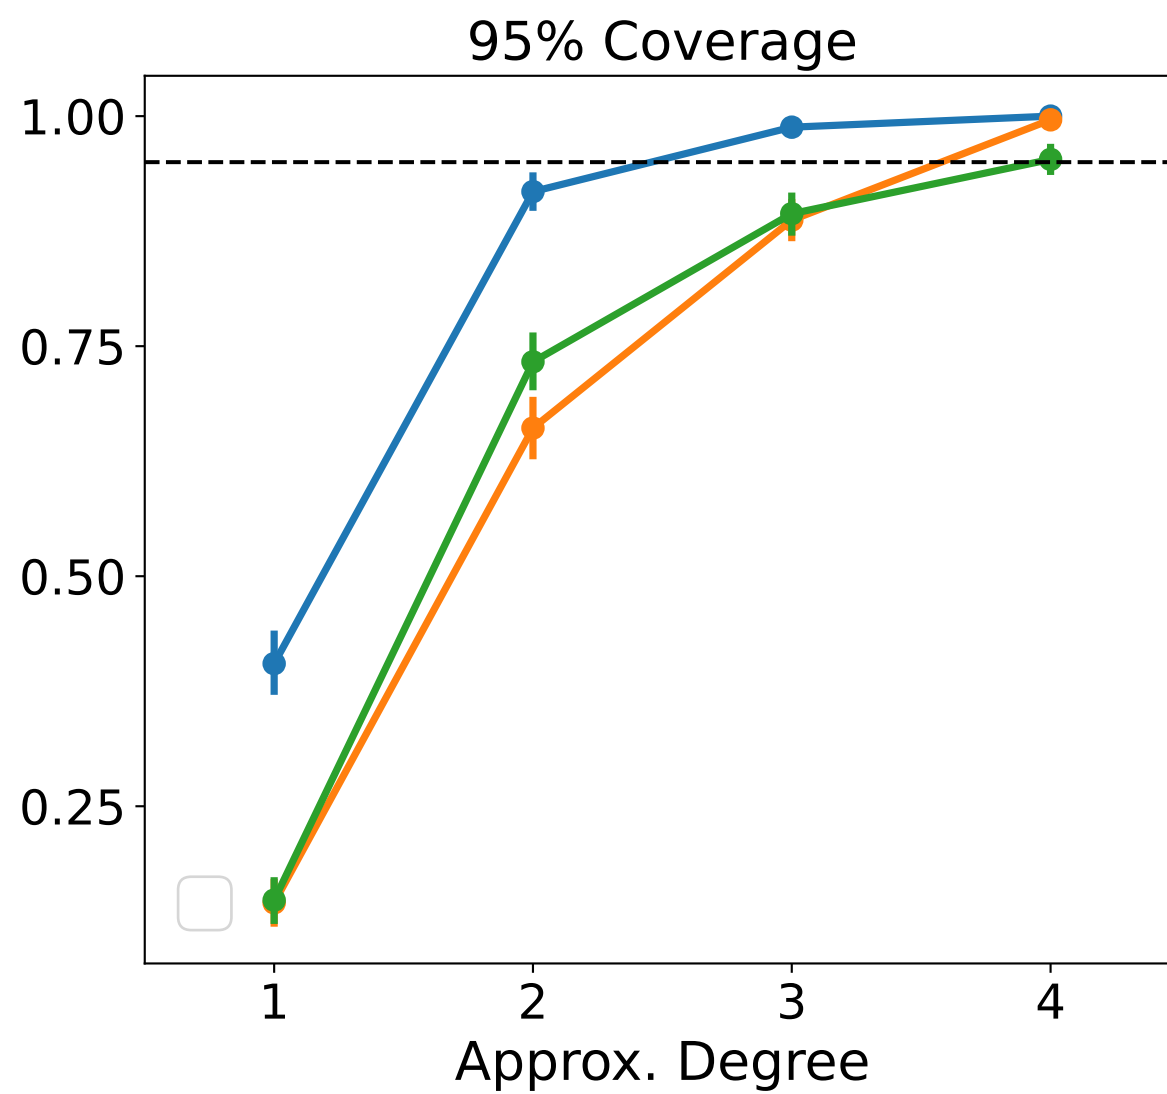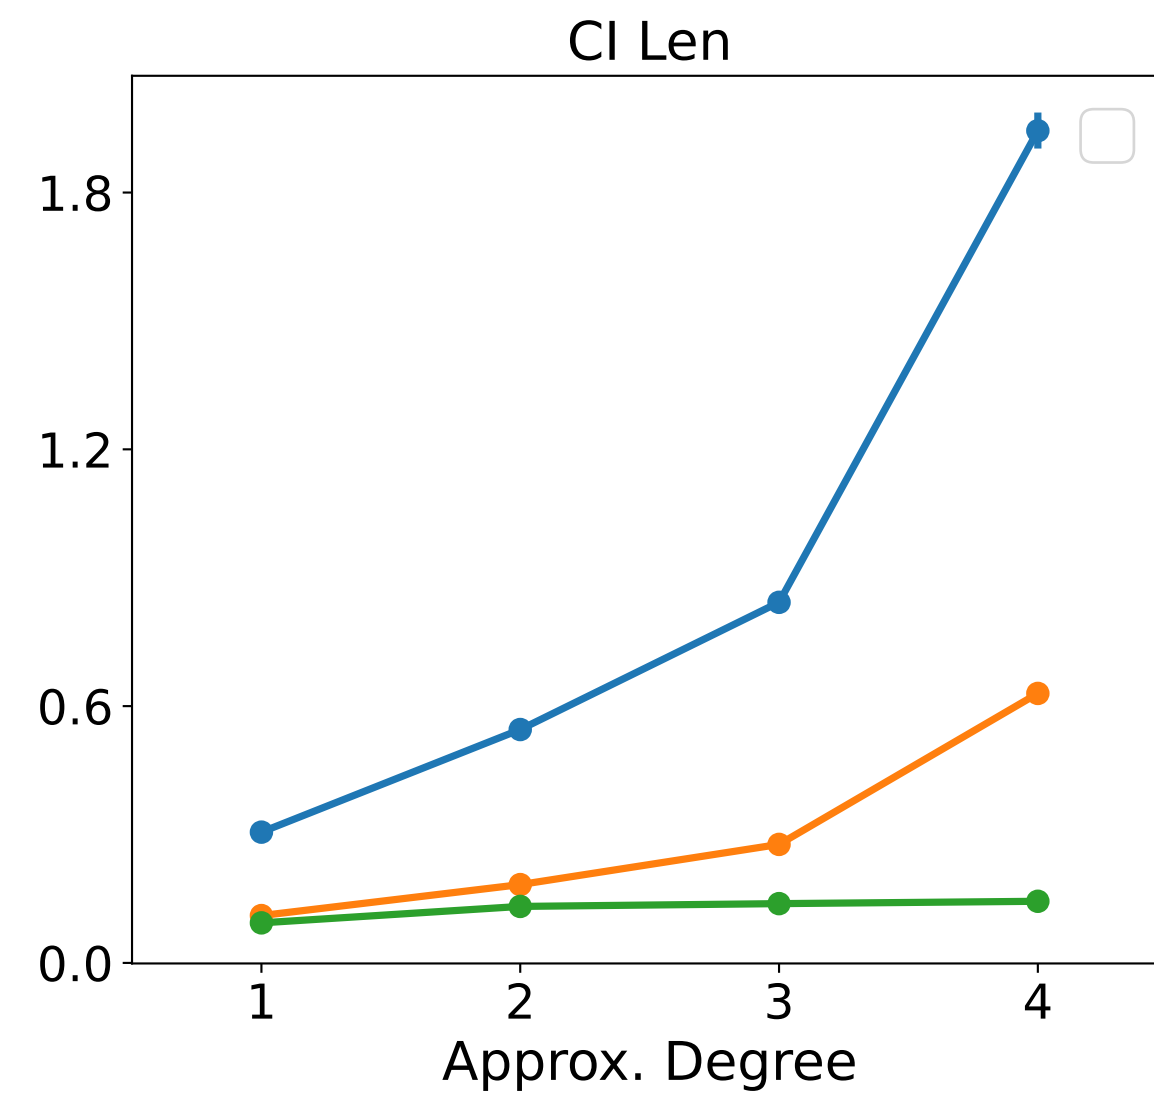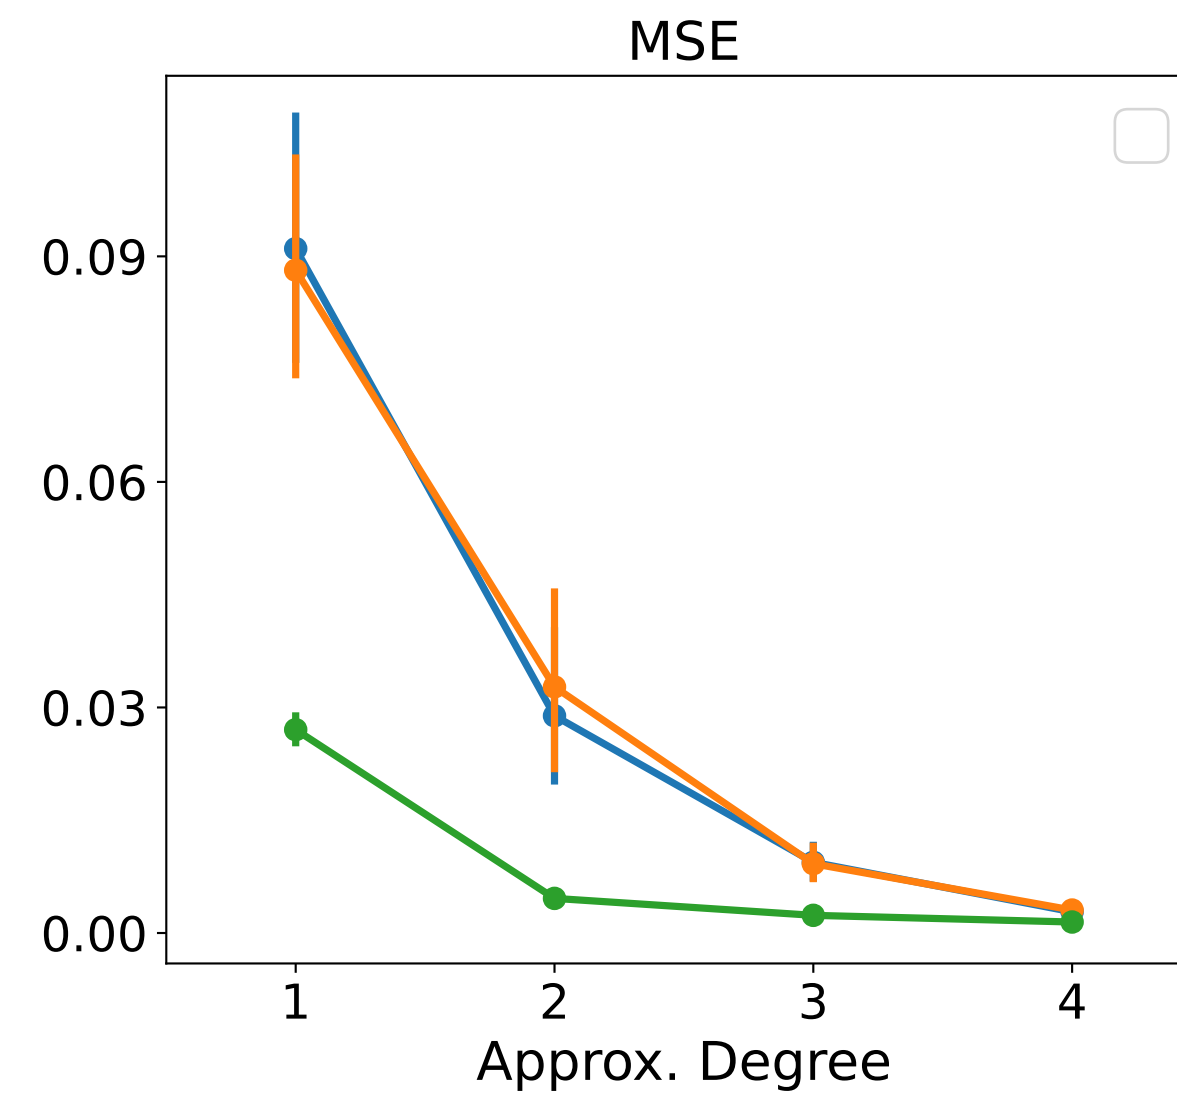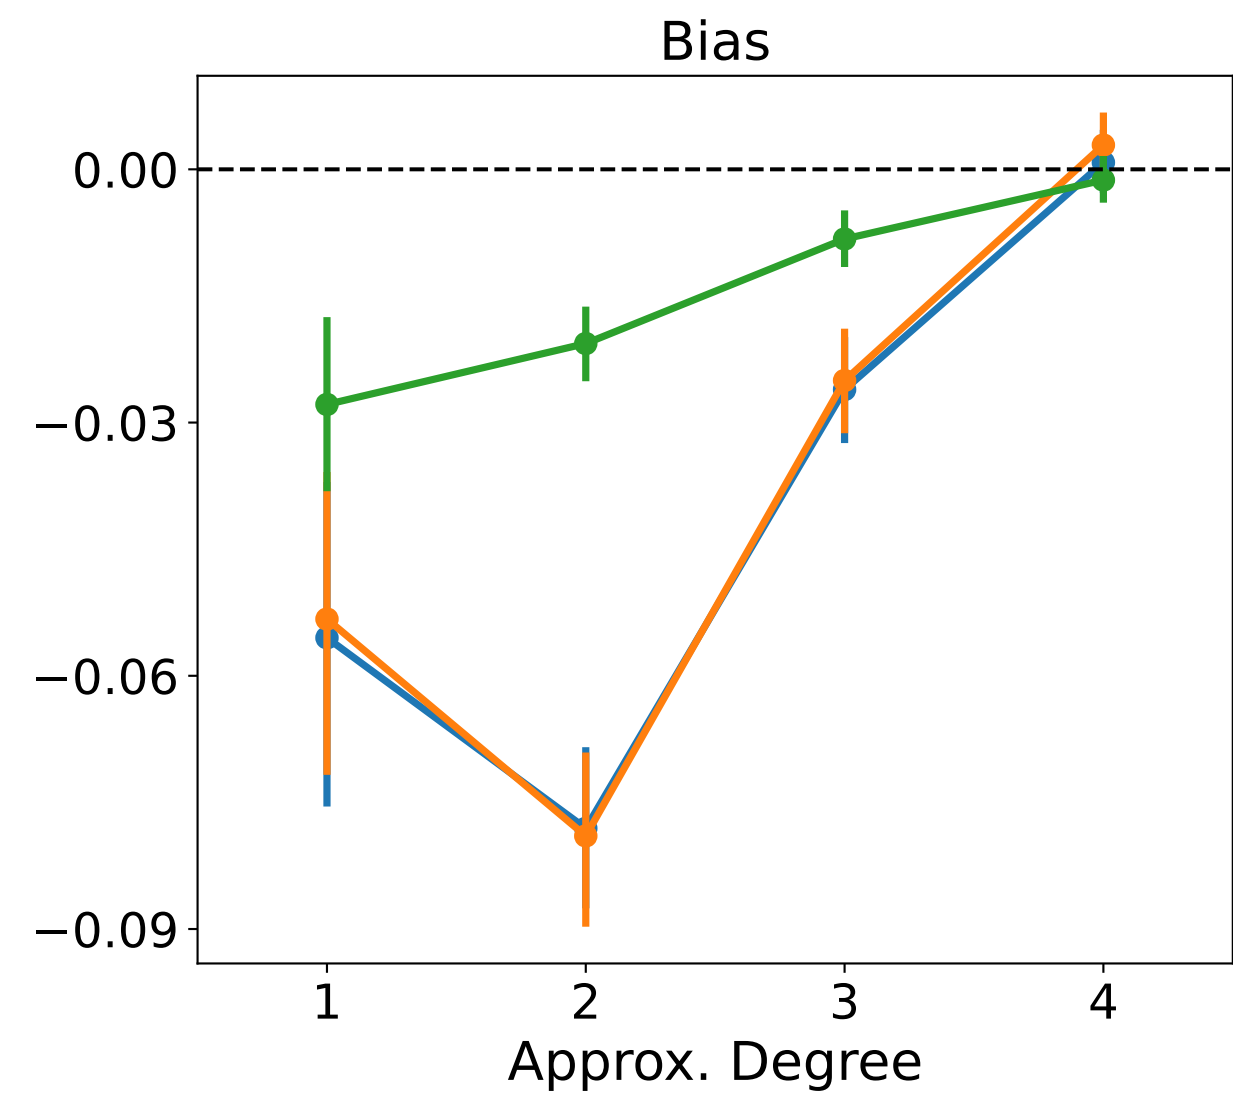

naive consistent feasible

Supplement: opre.2024.1019.sm1.gz [file misspec_last_all_gmm.pdf › RuohanZhan-rl_inference-41a34da/plots/misspec_last_all_gmm.pdf]

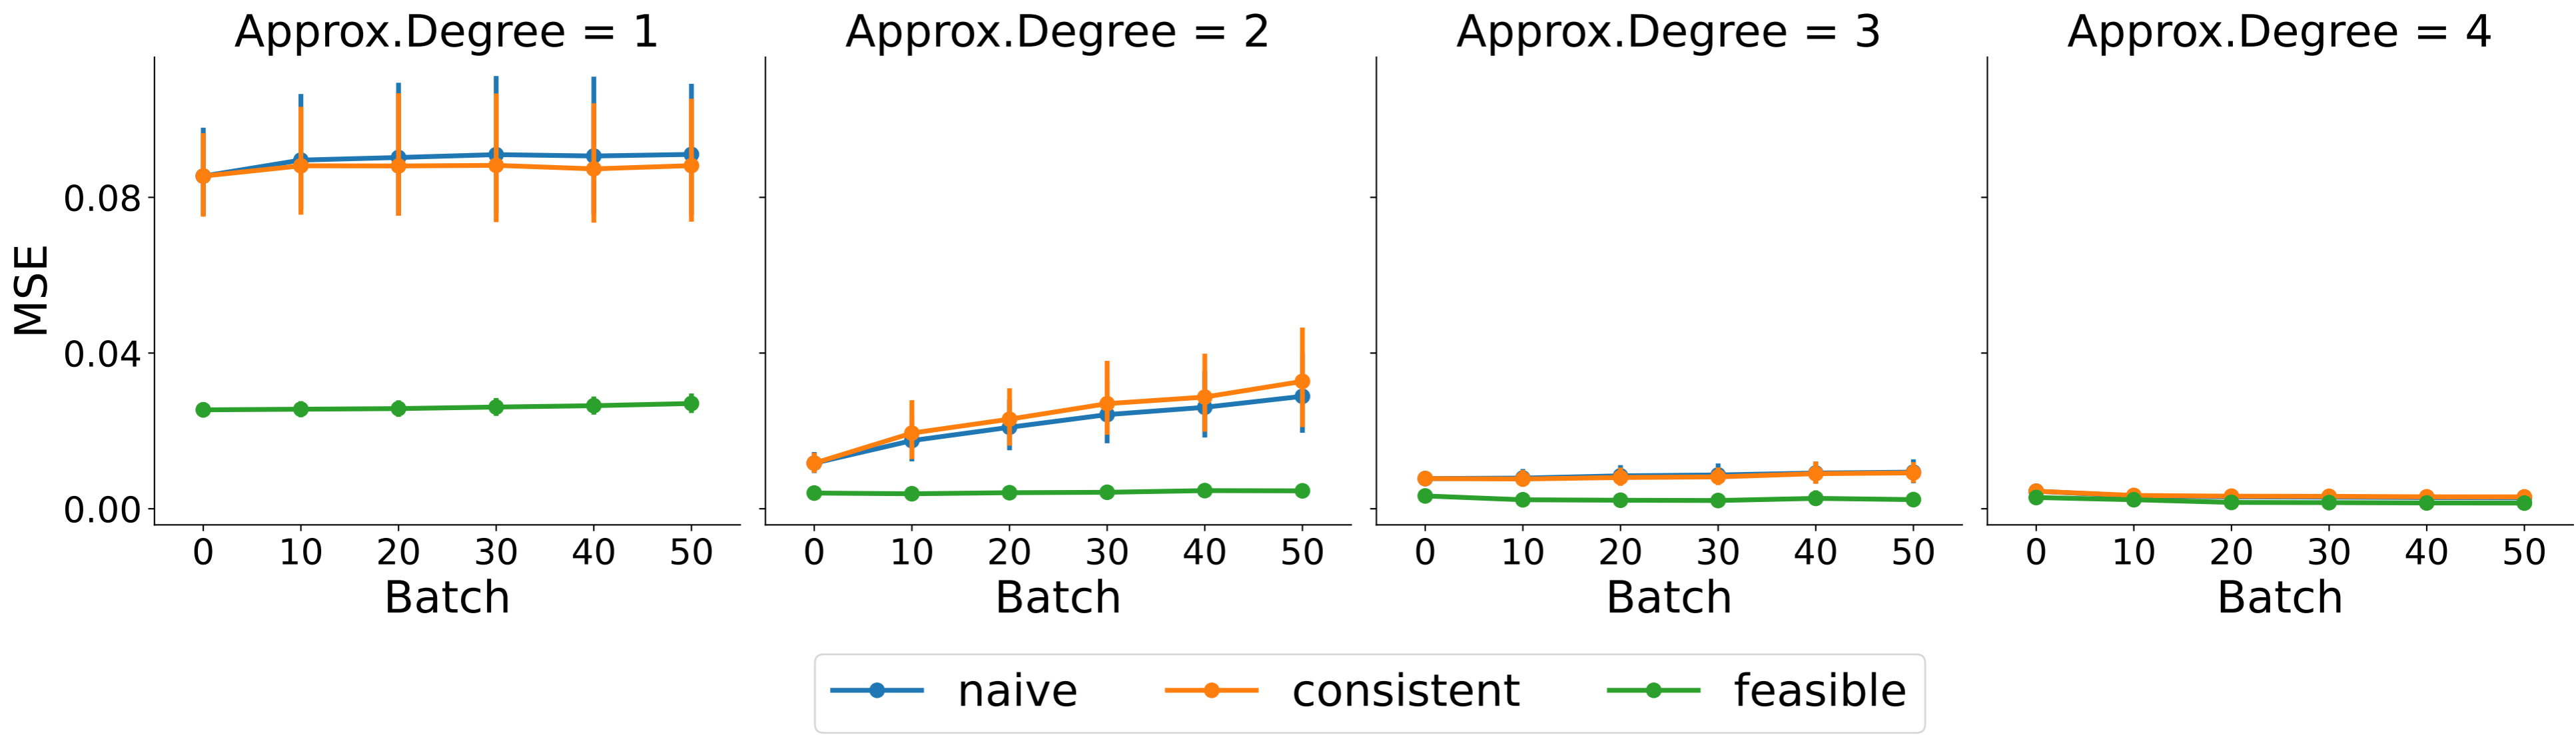

Supplement: opre.2024.1019.sm1.gz [file misspec_mse_gmm.pdf › RuohanZhan-rl_inference-41a34da/plots/misspec_mse_gmm.pdf]

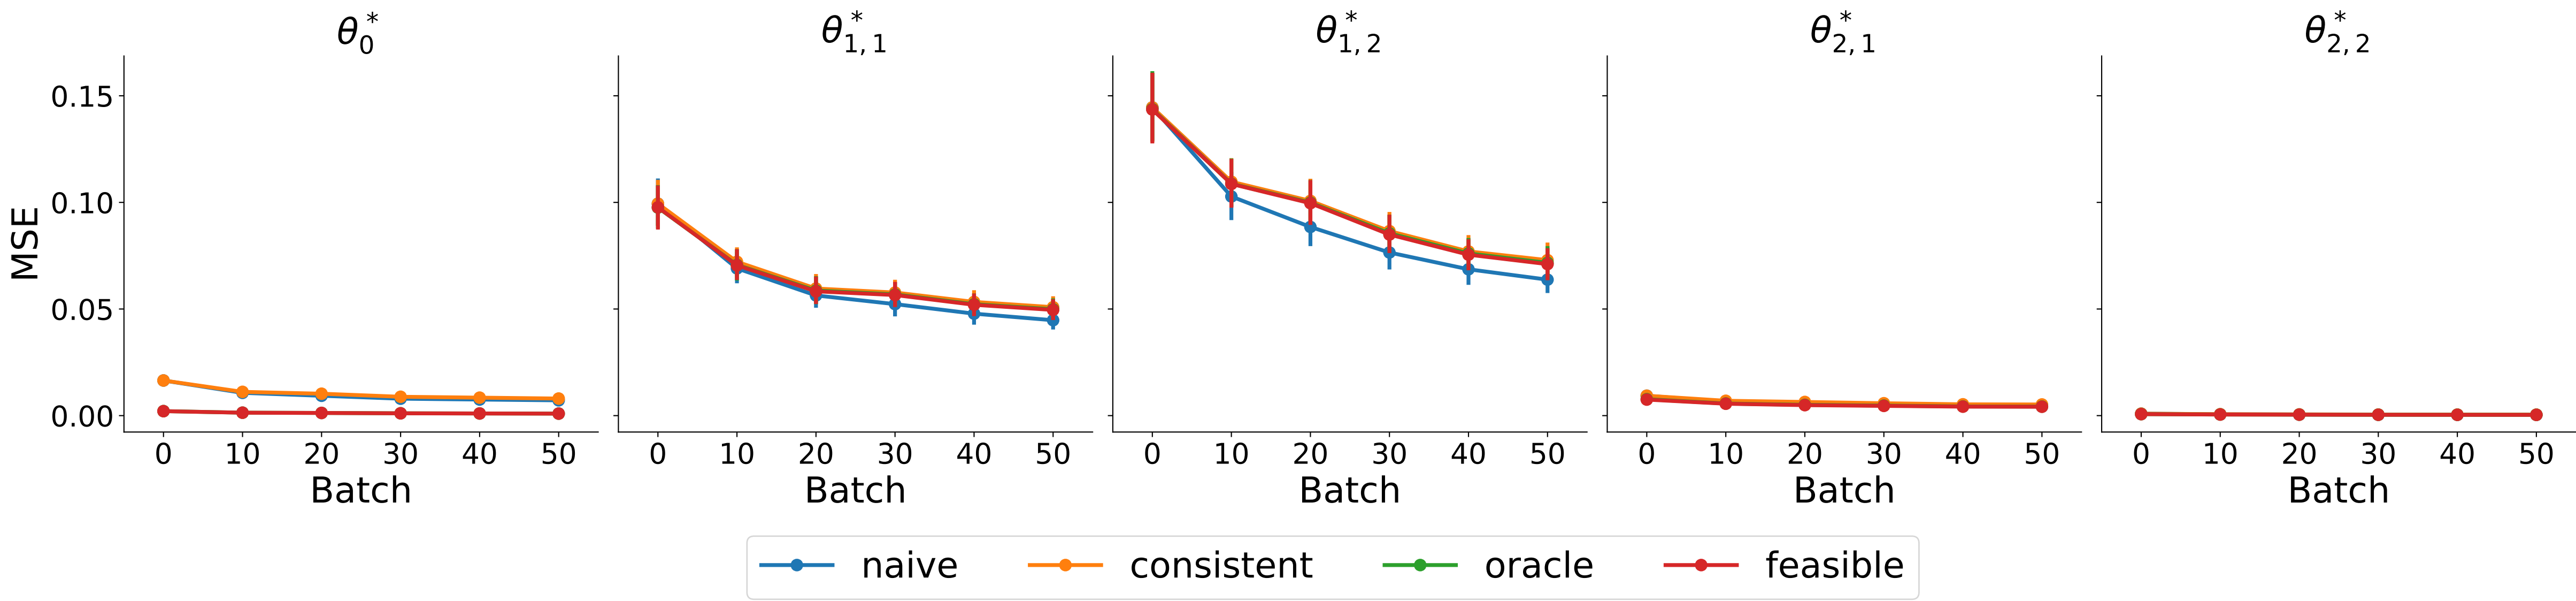

Supplement: opre.2024.1019.sm1.gz [file mse_gmm.pdf › RuohanZhan-rl_inference-41a34da/plots/mse_gmm.pdf]

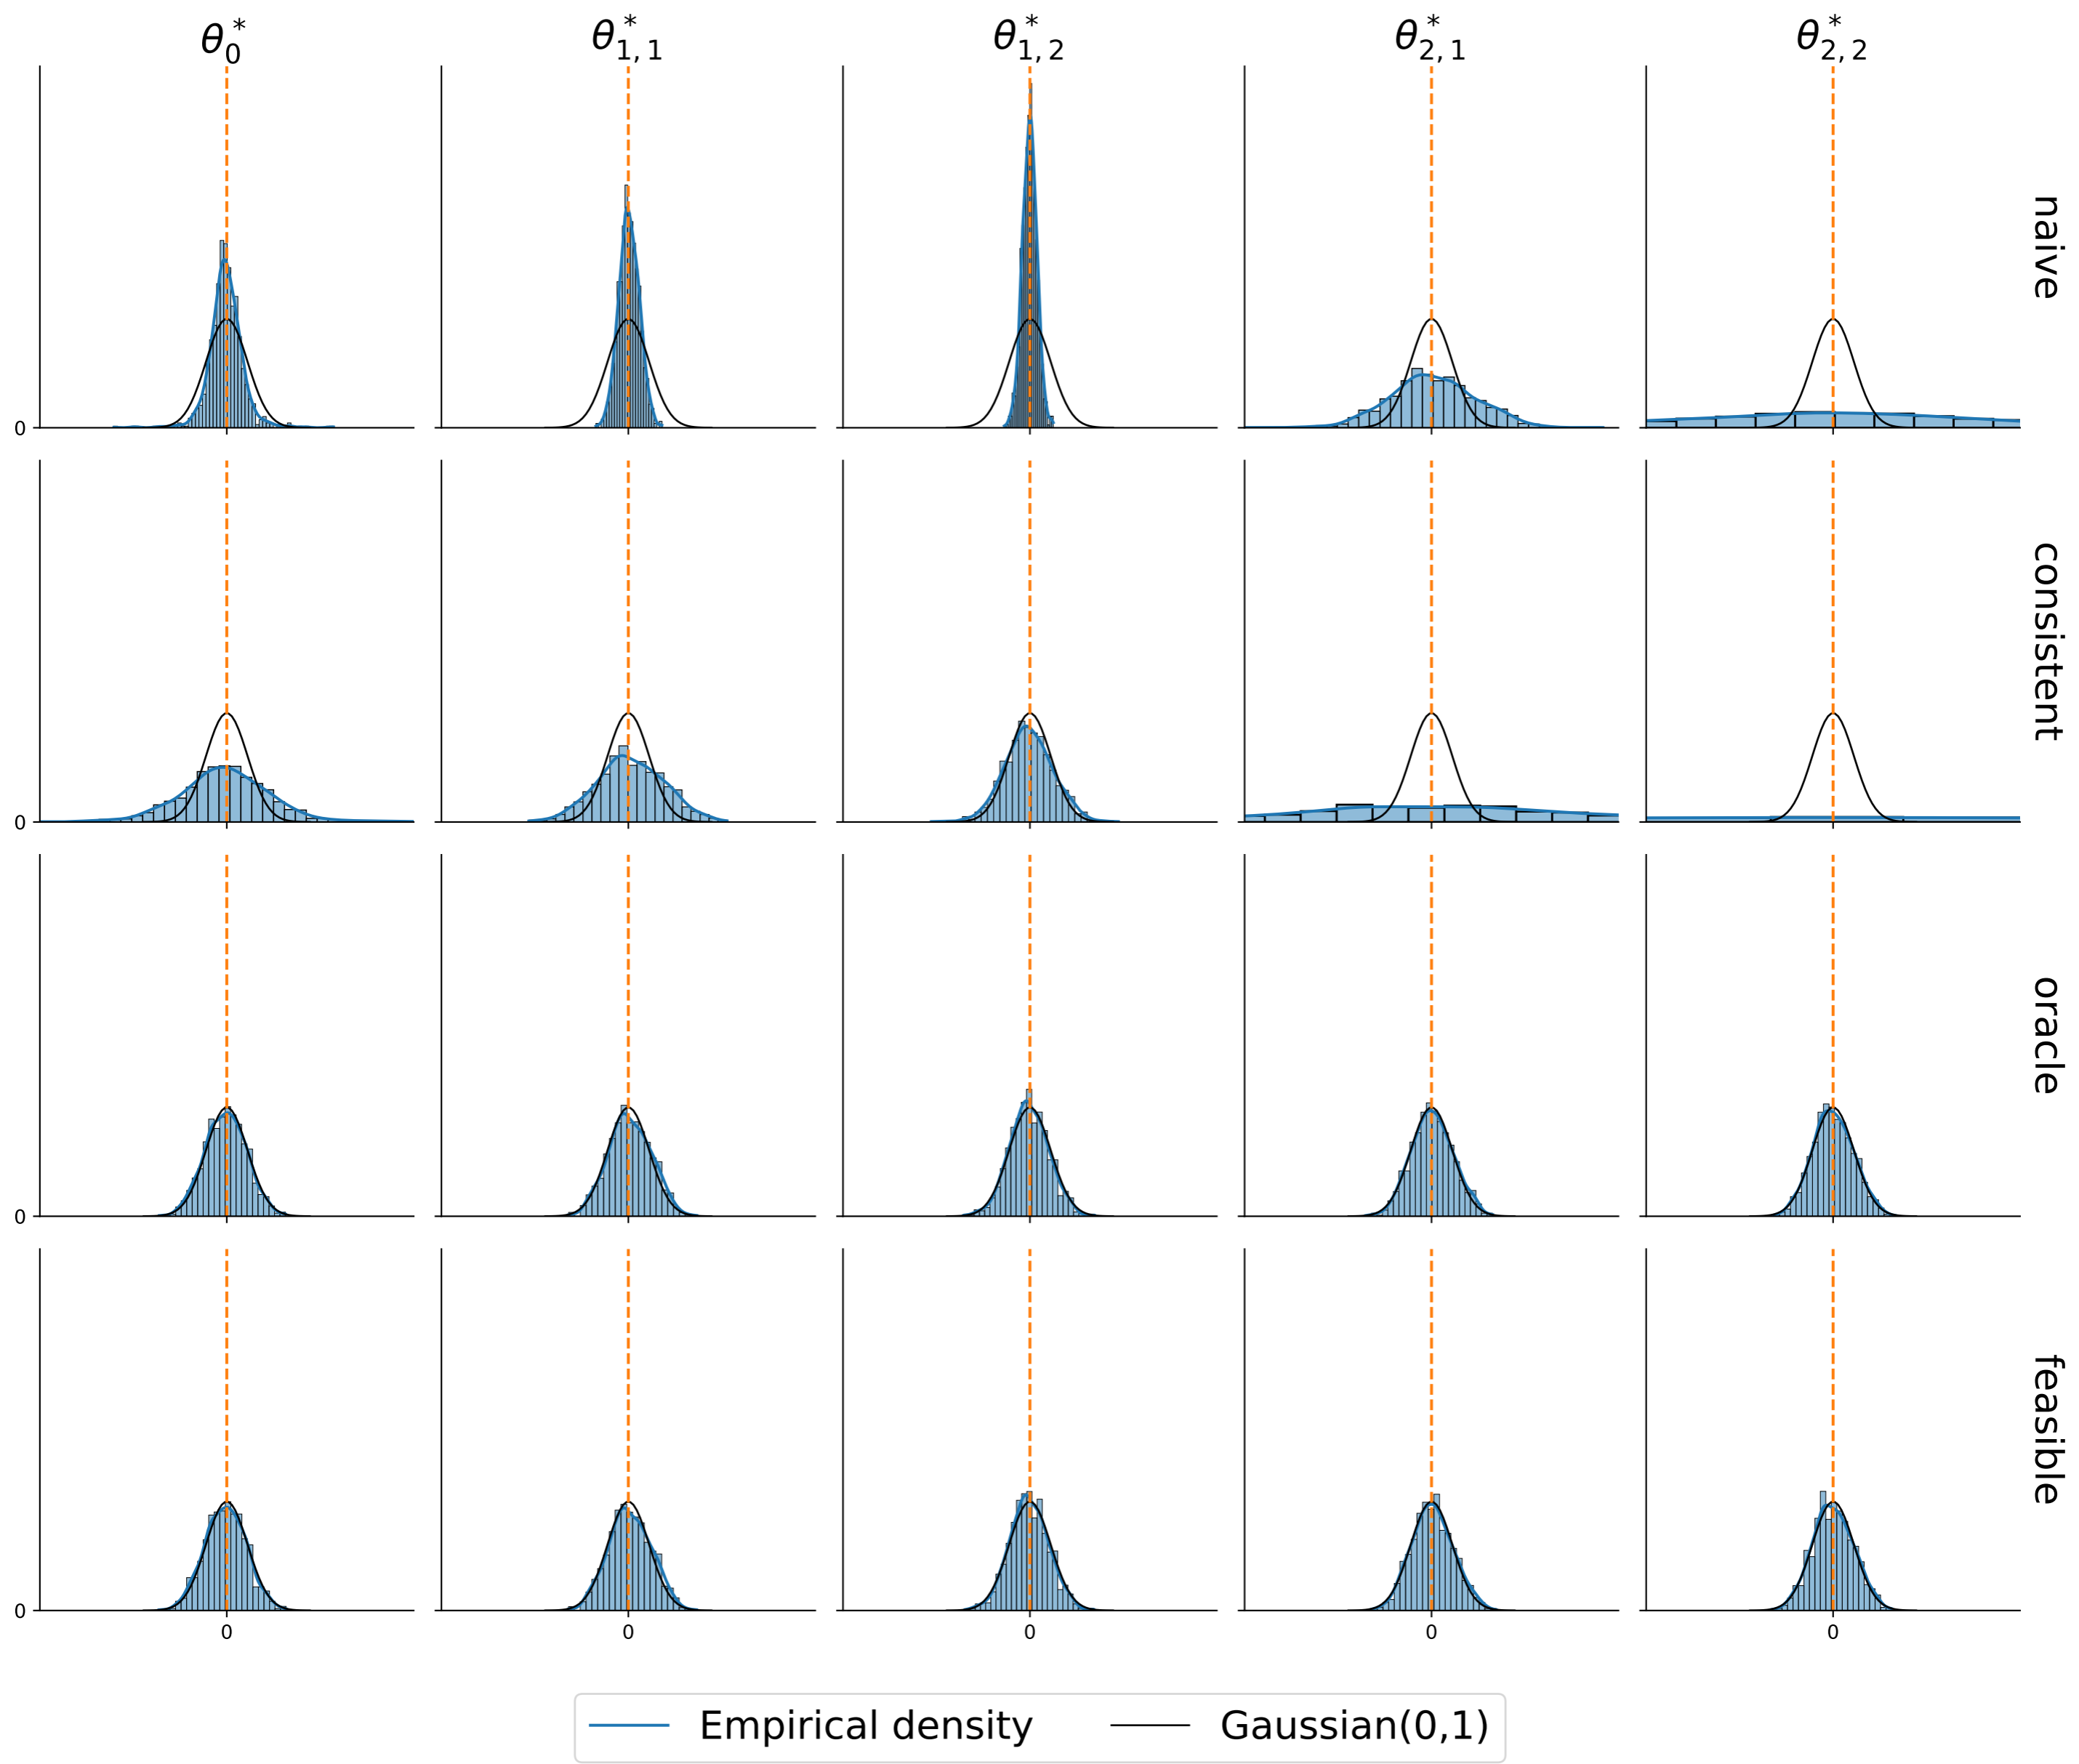

Supplement: opre.2024.1019.sm1.gz [file tstats_hist_gmm.pdf › RuohanZhan-rl_inference-41a34da/plots/tstats_hist_gmm.pdf]
